# Supplementary material for: Soy protein compared with whey protein ameliorates insulin resistance by regulating lipid metabolism, AMPK/mTOR pathway and gut microbiota in high-fat diet-fed mice
Source: Royal Society of Chemistry journal article supplement (doi:10.1039/d3fo01093g), 2023-01-01
Supplement: d3fo01093g1.pdf [file d3fo01093g1.pdf]

**Supplementary Table 1** Compositions of experimental diets<sup>#</sup>

|                         | Control | 10% WPI | 20% WPI | 30% WPI | 10% SPI | 20% SPI | 30% SPI |
|-------------------------|---------|---------|---------|---------|---------|---------|---------|
| <b>Ingredient (g)</b>   |         |         |         |         |         |         |         |
| Casein                  | 200     | 0       | 0       | 0       | 0       | 0       | 0       |
| Whey protein isolate    | 0       | 100     | 200     | 300     | 0       | 0       | 0       |
| Soy protein isolate     | 0       | 0       | 0       | 0       | 100     | 200     | 300     |
| L-Cystine               | 3       | 3       | 3       | 3       | 3       | 3       | 3       |
| Corn starch             | 506.2   | 0       | 0       | 0       | 0       | 0       | 0       |
| Maltodextrin 10         | 125     | 125     | 125     | 97.8    | 125     | 125     | 97.8    |
| Sucrose                 | 72.8    | 172.8   | 72.8    | 0       | 172.8   | 72.8    | 0       |
| Cellulose, BW200        | 50      | 50      | 50      | 50      | 50      | 50      | 50      |
| Soybean oil             | 25      | 25      | 25      | 25      | 25      | 25      | 25      |
| Cocoa butter            | 20      | 245     | 245     | 245     | 245     | 245     | 245     |
| Mineral mix S10026B     | 50      | 50      | 50      | 50      | 50      | 50      | 50      |
| Vitamin mix V10001C     | 1       | 1       | 1       | 1       | 1       | 1       | 1       |
| Choline bitartrate      | 2       | 2       | 2       | 2       | 2       | 2       | 2       |
| FD&C yellow dye #5      | 0.04    | 0       | 0       | 0       | 0       | 0       | 0       |
| FD&C blue dye #1        | 0.01    | 0.05    | 0.05    | 0.05    | 0.05    | 0.05    | 0.05    |
| Total (g)               | 1055.05 | 773.85  | 773.85  | 773.85  | 773.85  | 773.85  | 773.85  |
| <b>Energy (kcal %)</b>  |         |         |         |         |         |         |         |
| Protein                 | 20%     | 10%     | 20%     | 30%     | 10%     | 20%     | 30%     |
| Carbohydrate            | 70%     | 30%     | 20%     | 10%     | 30%     | 20%     | 10%     |
| Fat                     | 10%     | 60%     | 60%     | 60%     | 60%     | 60%     | 60%     |
| Energy density (kcal/g) | 3.85    | 5.22    | 5.22    | 5.22    | 5.22    | 5.22    | 5.22    |

<sup>#</sup> The feeds composition table has been reported in our previous study.<sup>1</sup> WPI, whey protein isolate; SPI, soy protein isolate.

**Supplementary Table 2** Primers sequences used in Real-time PCR

| <b>Genes</b>                            | <b>Sequence</b>           |
|-----------------------------------------|---------------------------|
| <i>CD36</i> forward                     | GCAGGTCTATCTACGCTGTGTTCG  |
| <i>CD36</i> reverse                     | TGTCTGGATTCTGGAGGGGTGATG  |
| <i>SLC27A1</i> forward                  | TCTACGGGTTGACGGTGGTACTG   |
| <i>SLC27A1</i> reverse                  | CTCAGCAGGTAGCGGCAGATTTC   |
| <i>PPAR<math>\gamma</math></i> forward  | GCCAAGGTGCTCCAGAAGATGAC   |
| <i>PPAR<math>\gamma</math></i> reverse  | GTGAAGGCTCATGTCTGTCTCTGTC |
| <i>CPT1b</i> forward                    | GAGGAAGGGTAGAGTGGGCAGAG   |
| <i>CPT1b</i> reverse                    | TCATCCAGGGTCACAAAGAAAGCAG |
| <i>PPAR<math>\alpha</math></i> forward  | CTTCACGATGCTGTCCTCCTTGATG |
| <i>PPAR<math>\alpha</math></i> reverse  | GATGTCACAGAACGGCTTCCTCAG  |
| <i>AMPK<math>\alpha</math></i> forward  | CTACCTAGCAACCAGCCCAC      |
| <i>AMPK<math>\alpha</math></i> reverse  | ACGTCTGAGGGCTTTCCTTG      |
| <i>SREBP1c</i> forward                  | GGATGCGGCTGTTGTCTACCATAAG |
| <i>SREBP1c</i> reverse                  | CCAGGTTAGAAGCAGCAAGATGTCC |
| <i>FASN</i> forward                     | GGATATTGTCGCTCTGAGGCTGTTG |
| <i>FASN</i> reverse                     | TGCTCCTTGCTGCCATCTGTATTG  |
| <i>ACCI</i> forward                     | CCCAGAGATGTTTCGGCAGTCAC   |
| <i>ACCI</i> reverse                     | GTCAGGATGTCGGAAGGCAAAGG   |
| <i>HSL</i> forward                      | GACAGGACAGCAAGTACTCAACAG  |
| <i>HSL</i> reverse                      | GCCTCCGTGGATGTGAACAACC    |
| <i>DGAT1</i> forward                    | AGCTATCCAGACAACCTGACCTACC |
| <i>DGAT1</i> reverse                    | TCAAGAACTCGTCGTAGCAGAAAGC |
| <i>LPL</i> forward                      | CGCTCTCAGATGCCCTACAAAGTG  |
| <i>LPL</i> reverse                      | TTGTGTTGCTTGCCATCCTCAGTC  |
| <i>GLUT4</i> forward                    | AGCCAGCCTACGCCACCATAG     |
| <i>GLUT4</i> reverse                    | TCCGTCGTCCAGCTCGTTCTAC    |
| <i>IRS-1</i> forward                    | CCAGCAGCAGTAGCAGCATCAG    |
| <i>IRS-1</i> reverse                    | GCTTACCGCCACCACTCTCAAC    |
| <i>PI3K</i> forward                     | GGAATGTCGGGAGCAGCAACC     |
| <i>PI3K</i> reverse                     | TCTACCACTACGGAGCAGGCATAG  |
| <i>AKT</i> forward                      | TCAGGATGTGGATCAGCGAGAGTC  |
| <i>AKT</i> reverse                      | AGGCAGCGGATGATAAAGGTGTTG  |
| <i>mTOR</i> forward                     | ACCGTCCGCCTTCACAGATAACC   |
| <i>mTOR</i> reverse                     | GCAGTCCGTTCCCTTCTCCTTCTTG |
| <i>S6K1</i> forward                     | CCTGTCAGCCCAGTCAAATTCTCTC |
| <i>S6K1</i> reverse                     | CCGCTCACTGTACATCCATCTG    |
| <i><math>\beta</math>-actin</i> forward | TATGCTCTCCCTCACGCCATCC    |
| <i><math>\beta</math>-actin</i> reverse | GTCACGCACGATTTCCCTCTCAG   |

*CD36*, cluster of differentiation 36; *SLC27A1*, solute carrier family 27 member 1; *PPAR $\gamma$* , peroxisome proliferator-activated receptor gamma; *CPT1b*, carnitine palmitoyl transferase 1b; *PPAR $\alpha$* , peroxisome proliferator-activated receptor alpha; *AMPK $\alpha$* , AMP-activated protein kinase alpha; *SREBP1c*, sterol regulatory element binding protein-1c; *FASN*, fatty acid synthase; *ACC1*,

acetyl-Coenzyme A carboxylase alpha; *HSL*, hormone-sensitive lipase; *DGATI*, diacylglycerol O-acyltransferase 1; *LPL*, lipoprotein lipase; *GLUT4*, glucose transporter 4; *IRS-1*, insulin receptor substrate 1; *PI3K*, phosphatidylinositol 3-kinase; *AKT*, protein kinase B; *mTOR*, mammalian target of rapamycin; *S6K1*, S6 kinase 1.

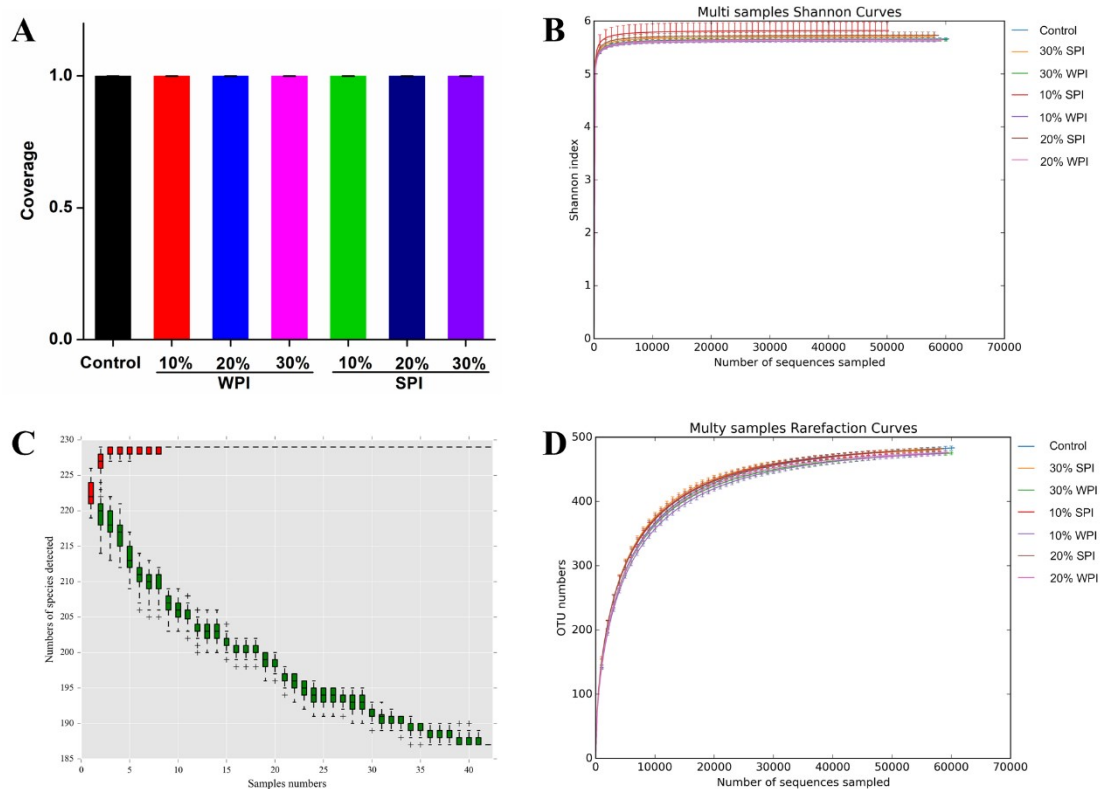

**Supplementary Fig. 1** Coverage (A); Shannon index curve (B); cumulative curve of species relative abundance at genus level (C); rarefaction curve (D). Data represent mean  $\pm$  SEM ( $n = 6$ ). WPI, whey protein isolate; SPI, soy protein isolate.

## Reference

1. A. Ji, W. Chen, T. Zhang, R. Shi, X. Wang, Y. Wang, H. Xu and D. Li, Whey protein and soy protein prevent obesity by upregulating uncoupling protein 1 to activate brown adipose tissue and promote white adipose tissue browning in high-fat diet-fed mice, *Food Funct.*, 2022, 13, 12836–12851.
